1 **Title page**

2 **Potential of fungicides, botanicals and biocontrol agents to induce physio-biochemical**  
3 **tolerance on *Curcuma longa* impaired by *Colletotrichum gloeosporioides***

4 \*Corresponding Author: Nasreen Musheer

5 E-mail: musheernasreen@gmail.com

6 **ORCID iDs;**

7 Nasreen Musheer: 0000-0001-7943-2073

8 Arshi Jamil: 0000-0002-4732-7700

9 **Highlights**

- 10 • Foliar treatments improve desirable plant physio-biochemical traits against pathogen.  
11 • Physio-biochemical variation induces the innate plant defense system.  
12 • High phyto-phenol accumulation counteracts the pathogenic stress.  
13 • Turmeric plant's health and yield enhance by the reduction of disease intensity.

14 **Declarations**

15 **Funding**

16 No participants of any funding agency during this study

17 **Conflict of Interest**

18 The authors declare that they have no conflict of interest.

19 **Ethical approval**

20 This article does not contain any studies with human participants or animals performed by the  
21 authors.

22 **Consent to participate**

23 Not applicable

24 **Consent for publications**

25 Not applicable

26 **Availability of data and material**

27 The genome database of isolated *Trichoderma* spp. and *Colletotrichum gloeosporioides* were  
28 deposited in National Centre of Biotechnology Information (NCBI) and acquired specific  
29 accession number of each isolate by which the nucleotide sequence records of each fungus could  
30 be generated: AMUCG1 (MK765035), AMU TV11 (MK764992), AMU THR1 (MK765028) and  
31 AMUTVR2 (MK774725).

32 **Code availability**

33 Not applicable

34 **Authors' contributions**

35 NM has special involvement in isolation, and morphological and molecular characterization of  
36 pathogen associated with turmeric leaf spot. Pot and field trials were conducted to examine the  
37 efficiency of fungicides, botanical extracts and biocontrol agents to enhance innate phyto-  
38 physiobiochemical tolerance of plants and immune the turmeric plants against *C.*  
39 *gloeosporioides* infection. NM, SA and AJ have approved the accuracy or integrity related to any  
40 part of the manuscript before submission.

41  
42  
43  
44  
45  
46  
47  
48  
49  
50  
51  
52

53 **Potential of fungicides, botanicals and biocontrol agents to induce physio-biochemical**  
54 **tolerance on *Curcuma longa* impaired by *Colletotrichum gloeosporioides***

55  
56  
57 **Nasreen Musheer\*, Shabbir Ashraf and Arshi Jamil**

58 Department of Plant Protection, Aligarh Muslim University, Aligarh, India.

59 \*Corresponding Author: Email: [musheernasreen@gmail.com](mailto:musheernasreen@gmail.com)

60  
61 **Abstract**

62 Necrotic leaf spot of *Curcuma longa* (turmeric) limits the chief physio-biochemical activity for  
63 maintaining the plant health and productivity. In the present study, polyhouse and open field  
64 trials were conducted to estimate the pathogenicity of *C. gloeosporioides* on turmeric and to  
65 evaluate the foliar efficiency of propiconazole @ RD and copper oxychloride, extracts of *A.*  
66 *indica*, *A. sativum* and *O. sanctum* @ 40%, and culture filtrates of *T. viride*, *T. harzianum* and *T.*  
67 *virrens* @  $4 \times 10^6$  cfu/ml in inducing physio-biochemical tolerance of pathogen inoculated and  
68 non-inoculated plants. In both the trials, these three agents yielded the highest efficiency to  
69 enhance the physio-biochemical traits. The induced physio-biochemical tolerance in treated  
70 turmeric plants showed variation in the elevation of plant health and immunity in response to  
71 pathogen aggressiveness or disease severity. However, phytophenol content was quite higher in  
72 infected plants than non-infected plants due to initiation of defense reaction in response of  
73 pathogenic elicitors. Thus, the present study demonstrated the novelty of physio-biochemical  
74 tolerance induction on turmeric plants by using fungicides, biocontrol agents and phytoextracts.

75 **Keywords:** *Curcuma longa*, foliar spray, physio-biochemical, *Colletotrichum gloeosporioides*

76  
77 **1. Introduction**

78 Turmeric (*Curcuma longa* L.) is one of the most important annual, monocotyledonous  
79 rhizomatous crop (Vasala et al. 2012). The demand of turmeric cultivation at national and  
80 international level is increasing profusely day by day in order to support the green health  
81 remedies and culinary purposes. Rhizome is the chief source of reserving essential bio-secondary  
82 metabolites including alkaloids, glycosides, coumarins, flavonoids, steroids, corticosteroids,  
83 essential oils, etc. (Amalraj et al. 2016). India is one of the known leading countries in  
84 production, consumption and export services of turmeric (Anuradha et al. 2018). Successful  
85 cultivation of turmeric in different states of India was found to be suppressed by abiotic and

86 biotic stress conditions (Singh et al. 2013; Anandaraj et al. 2014). Amongst the diseases, leaf  
87 spot is a severe fungal disease caused by hemibiotrophic pathogen, *Colletotrichum*  
88 *gloeosporioides* (Panz. and Sacc.); this disease leads to significant yield loss (>50%) (Hudge  
89 and Ghugul 2010). The management of turmeric leaf spot disease caused by pathogen  
90 *Colletotrichum* spp. by using fungicides, biocontrol agents and botanicals extracts, and their  
91 influence on the physio-biochemical activity and growth of host plants have been focus of  
92 intensive research. The disease symptoms of turmeric are characterized by producing brown,  
93 necrotic and sunken lesions of ashy center and surrounded by yellow halo or sometime numerous  
94 black dots like a structure called ‘acervuli’ formed in a concentric manner on leaves during  
95 September and October months (Ramakrishnan, 1954; Adhipath et al. 2013). The prevailing  
96 atmospheric conditions are favored by continuous rain, high humidity 80-90% and optimum  
97 temperature, which cause great loss in yield of rhizome up to 62.5% (Mishra and Pandey 2015).

98 Plants’ interaction with pathogen is recognized by microbial molecules called elicitors,  
99 which cause modification in host-physio-biochemical functions. Elicitors are classified as  
100 pathogen-associated molecular patterns that induce pattern-triggered immunity (PTI) in host  
101 plant by pattern recognition receptors and effector-associated virulent pathogens that contribute  
102 to effector-triggered immunity (ETI) by encoding R genes (Jones and Dangl, 2006; Smakowska-  
103 Luzan et al. 2018). Fungal-effectors of susceptible host plant promotes pathogenesis by  
104 interfering in both PTI and ETI (Tan et al. 2010; He et al. 2020). Infection caused by pathogen  
105 *Colletotrichum* sp. limits the photosynthesis or other physiological process of host plants (Berger  
106 et al. 2007 a, b; Guerra et al. 2014; Dallagnol et al. 2015). The deterioration of leaf cuticle and  
107 chloroplast cells is associated with the decline of photo-pigments concentration, viability as well  
108 as numbers of stomata with progress of plant-fungus parasitic interaction (Resende et al. 2012).  
109 Therefore, stomatal closure limited the absorption of light and disturbed the water equilibrium in  
110 plant, thus suppressing both transpiration rate and stomatal conductance during infection (Lobato  
111 et al. 2009). The diffusion of CO<sub>2</sub> from surrounding atmosphere into plants increases the  
112 synthesis of new carbohydrate molecules serves as source for biomass enhancement (Van der  
113 Kooi et al. 2016; Thompson et al. 2017). *Colletotrichum truncatum* anthracnose disease of  
114 soybean affects the physiological performance and causes great loss in the yield (Dias et al.  
115 2018).

116 Previous studies have suggested an integrated approach for disease management by using  
117 cultural, mechanical, biological and chemical controls (Wharton and Dieguez-Uribeondo, 2004;  
118 Agrios 2005). Several parameters were studied under phyto-physio-biochemical tolerance, such  
119 as assimilation rate, transpiration rate, photosynthesis, stomatal conductance and  
120 bioaccumulation of chlorophyll, carotenoid, phenol of leaf tissues and curcumin or oleoresin of  
121 rhizome tissues. Improved physio-biochemical functioning of plants is proportionally related to  
122 treatments. A major threat of physio-biochemical process is *C. gloeosporioides* that reduces the  
123 tolerance level in plants (Castro et al. 2016). The localized infection in plant tissue upregulates  
124 defense genes to PR-proteins (salicylic acid), enzymes (Chitinases and  $\beta$ 1,3-glucanases) and  
125 transcription factors (expression of genes by interacting with cis-elements present in the  
126 promoter region), which are known to activate physio-biochemical tolerance in plants against  
127 pathogen (Koch et al. 2016; Israel Pagan and Fernando 2018; Ethan et al. 2018). Accordingly,  
128 genes expression of proteins and enzymes (particularly involved in glycolysis and Krebs cycle)  
129 provides the adequate energy to enhance various metabolic processes of the plants to increase  
130 tolerance level against stress (Kosova et al. 2018; Xing et al. 2019).

131 Mishra and Pandey (2015) reported that foliar application of propiconazole (0.1%) was  
132 significantly superior in reducing the disease intensity of leaf spot (27.61 PDI) and increasing  
133 fresh rhizome yield (ranged from 33.96 - 34.33 t ha<sup>-1</sup> over the control (28.17t ha<sup>-1</sup>). Biocontrol  
134 agents enhance the desirable growth promoting characteristics and physio-biochemical changes  
135 in plants, which increases plant tolerance to pathogen by triggering plant defense system of  
136 induced systemic resistance (ISR) or systemic acquired resistance (SAR). *Trichoderma* species  
137 offer various mechanisms such as mycoparasitism and secretes (diffusible, volatile and non-  
138 volatile antifungal secondary metabolites) against both soil-borne (e.g. *R. solani* and *Sclerotium*  
139 *rolfsii*) and foliar pathogens like *Botrytis cinerea* (Lopez-Mondejar et al. 2011; Li et al. 2016).  
140 Jagtap et al. (2013) reported that high efficacy of *Trichoderma harzianum*, *Trichoderma viride*,  
141 *Gliocladium* spp., *Trichoderma koningii* and *Pseudomonas fluorescens* in the reduction of  
142 mycelial growth of *C. capsici* caused leaf spot disease of turmeric *in-vitro* conditions. Hung et  
143 al. (2013) also proved that the use of *Trichoderma viride* volatile organic compounds (VOCs) on  
144 *Arabidopsis thaliana* enhanced the biomass of plants and chlorophyll concentration. Many  
145 Phytoextracts possess antifungal properties against the phytopathogens, which could be used  
146 commercially without causing any toxic residual effect on ecosystem (Kumar et al. 2007). The

147 extract of azadirachtin was suppressed 89.25% mycelial growth of *C. gloeosporioides* (Hegde et  
148 al. 2014). Similarly, Jagtap et al. (2013) and Musheer et al. (2019) studied the foliar efficacy of  
149 fungicides, biocontrol agents and botanical extracts to enhance the growth and yield traits against  
150 the *C. gloeosporioides*.

151 While the use of fungicides, biocontrol agents and phytoextracts to enhance the growth  
152 yield of turmeric plant has been widely studied, there is lack of attention on their application to  
153 induce physio-biochemical tolerance on plants. Producing stress-tolerant variants of plants  
154 against biotic constrains by modifying the physio-biochemical traits has emerged as an efficient,  
155 viable and cost-effective approach. Accordingly, the present work has focused on the foliar  
156 application of fungicides, biocontrol agents and phytoextracts in the improvement of physio-  
157 biochemical activity of turmeric under pathogenic stress. Ployhouse and open-field experiments  
158 were conducted on turmeric plants for a period of four years (2015-19), and the data were  
159 analyzed by using statistical tools.

## 160 **2 Materials and Methods**

### 161 **2.1. Isolation and identification of pathogen and biocontrol agents.**

162 The isolation of *Colletotrichum* sp. was done on *Colletotrichum* specific Mathur's medium  
163 modified (peptone, magnesium sulphate, heptahydrate, potassium dihydrogen phosphate, sucrose  
164 and agar) by placing the infected pieces of turmeric leaves that showed the typical symptoms of  
165 necrotic or brown lesion in different shapes and sizes. Inoculated plates were allowed to incubate  
166 at 27±1°C till the appearance of mycelial growth and then purified by using hyphal tip culture  
167 method. *Trichoderma* was isolated from rhizosphere soil around the healthy turmeric plants by  
168 using *Trichoderma* selective medium (TSM). The Potato dextrose agar (PDA) medium was used  
169 to maintain the pure culture of pathogen and biocontrol agents.

#### 170 **2.1.1 Morphological characterization**

171 Identification was done on the basis of morphological characteristics like growth rate, pattern  
172 and colours of cultural growth on plate, whereas microscopic structures such as conidiophores,  
173 conidia, phialides or mycelium were visualized under high resolution (10X objective×10X  
174 ocular) compound binocular microscope.

#### 175 **2.1.2. Molecular characterization**

176 Morphologically identified isolates of *Colletotrichum* sp. and *Trichoderma* species were assessed  
177 for PCR amplification of 18s rRNA-internal transcribed spacer (ITS) of ribosomal RNA region  
178 by using universal primers ITS1 5' (TCCGTAGGTGAACCTGCGG) 3' and ITS4 5' (TCC  
179 TCCGCTTATTGATATGC) 3'. The PCR amplified products were of approximately 590bp size,  
180 which were obtained from Macrogen® Incorporation, South Korea. The purified nucleotide  
181 sequence was run in the nucleotide Basic Local Alignment Search Tool (BLAST) of the National  
182 Centre for Biotechnology Information (NCBI), in order to match with the available standard  
183 nucleotide database for exact species confirmation. The analyzed nucleotide sequence of  
184 pathogen and biocontrol agents had to be submitted to the GenBank of NCBI to acquire the  
185 specific accession number.

## 186 **2.2. Preparation of culture filtrates**

187 The culture filtrates of *Trichoderma* spp. and *Colletotrichum* sp. were prepared in nutrients  
188 broths (beef extract, yeast extract, peptone and sodium chloride) contained by 250ml Erlenmeyer  
189 flasks. Excised 5mm segment from the periphery of seven days old pure culture plates has  
190 transferred aseptically in to the broth and incubated at room temperature ( $27\pm 1^{\circ}\text{C}$ ) till the  
191 appearance of mycelial disc on the surface. Subsequently, the culture broth was filtered through  
192 double-layer cheese cloth and the spore suspension was then centrifuged at 5000rpm at  $28^{\circ}\text{C}$  for  
193 5 minutes. The conidial mass was collected in sediments and was re-suspended in sterile distilled  
194 water to maintain homogeneity of the suspension. The spore density per ml was measured by  
195 using haemocytometer.

## 196 **2.3. Preparation of phytoextracts**

197 Crude extraction of *Azadirachta indica* (neem leaf), *Ocimum sanctum* (tulsi leaf) and *Allium*  
198 *sativum* (garlic bulb) in distilled water (1:1w/v) were accomplished through a double-layered  
199 muslin cloth and Whatman No. 1 filter paper.

## 200 **2.4. Pot and field experiments**

201 The experiments were conducted for four years: pathogenicity test was conducted during the first  
202 year (2015-16) followed by polyhouse (2016-17) and field (2017-19) experiments in the  
203 department of Plant Protection, Aligarh Muslim University Aligarh (India) at  $27^{\circ}52.887'\text{N}$   
204 latitude and  $78^{\circ}4.4784'\text{E}$  longitude with elevation of 189 m above sea level.

205 The turmeric var. sogandham was grown in earthen pots of 20cm×30cm size filled with  
206 homogenous mixture of sterilized soil, decomposed farmyard manure and vermicompost in 2:1:1

207 ratio. Microplots of size  $1.5 \times 2\text{m}^2$  were prepared in a field area of  $180\text{m}^2$ . The healthy rhizome  
208 @ one rhizome/pot or five holes per ridges was sown in the third week of May (in 2015, 2016  
209 2017, 2018 and 2019) when the pre-monsoon shower is available to promote the  
210 budding/germination. Each microplot was maintained at interplant spacing of 40cm and inter-  
211 ridge spacing of 30cm with total number of five ridges and five holes per ridge, to avoid the  
212 moisture accumulation that is conducive for disease development. The planted pots were  
213 maintained under controlled environment conditions of polyhouse where they received favorable  
214 ambient conditions (temperature:  $28\text{-}30^\circ\text{C}$ , and relative humidity (80-90%)) for the efficient  
215 growth of turmeric. However, field soil of sandy loamy texture with pH 6.5 was fertilized at  
216 recommended dose (60 kg N: 60 kg  $\text{P}_2\text{O}_5$ : 120 kg  $\text{K}_2\text{O}$ ), FYM @ 4t/ha and neem cake @ 2t/ha  
217 applied as basal dressing and ploughed 2-3 times based on soil physiochemical results through  
218 Agriculture farmer welfare Ministry of Government of India, Aligarh. Chemical fertilizers half  
219 dose of N, full dose of P and half dose of K were applied before planting thereafter remaining  
220 half doses of both N and K were used at 45 and 90 days after planting (DAP) per hectare. (Roy  
221 and Hore 2012; Shamrao et al. 2013; Modupeola 2015). The pots and microplots were irrigated  
222 regularly with tap water till the harvest.

#### 223 **2.4. Pathogenicity test (2015-2016)**

224 The virulence effect of *C. gloeosporioides* on turmeric var. sogandham was measured at four  
225 different doses of pathogen inoculum under pot condition, during 2015-2016. Fifty ml spore  
226 suspension at conidial loads of  $1 \times 10^6$ ,  $2 \times 10^6$ ,  $3 \times 10^6$  and  $4 \times 10^6$  cfu/ml were adjusted via  
227 haemocytometer. These spore suspensions were sprayed on pricked leaves of turmeric at 3-4 leaf  
228 stage after three months of planting under the polyhouse conditions. The inoculated pots were  
229 incubated for 15 days or till the appearance of symptoms inside the poly house where they  
230 received the favorable ambient conditions ( $28 \pm 2^\circ\text{C}$  temperature and 90% relative humidity)  
231 essential for the disease development. Three replicates of each dose were maintained in  
232 completely randomized block design.

#### 233 **2.5 Foliar treatment: Polyhouse and field trials (2016-2019)**

234 The subsequent active season (2016-2017) of turmeric cultivation was selected for the  
235 screening of fungicides, botanicals and biocontrol agents against the pre inoculated pathogen @  
236  $3 \times 10^6$  cfu/ml and non-inoculated stage of the plants in pots. The pathogen @  $3 \times 10^6$  cfu/ml was  
237 found to cause reasonable damage to the plants. Therefore, this dose of pathogen inoculation was



238 used for the evaluation of three foliar sprays of fungicides, botanical extracts and biocontrol  
239 agents at 45 days interval after planting for the enhancement of both physiological and  
240 biochemical characteristics of the plant, which cause higher biomass under control environment  
241 conditions of polyhouse. Subsequently, field trial was done during 2017-2019 to screen each  
242 treatment efficiency against the natural occurrence of leaf spot disease under varied  
243 environmental conditions. Two fungicides viz. propiconazole and  
244 carbendazim12%+mancozeb63% were used @ lower than recommended dose (LRD),  
245 recommended dose (RD) and higher than recommended dose (HRD); botanical extracts of *A.*  
246 *indica*; *A. sativum* and *Sanctum* @40%; and culture filtrate of *T. viride*, *T. harzianum* and *T.*  
247 *virens* @  $4 \times 10^6$  cfu/ml. Each treatment was replicated in six pots and three microplots in a  
248 randomized block design (RBD) manner.

249 The brown spots severity on leaves was recorded at 0- 9 disease grade scale (0= no  
250 symptom; 1= less than1% leaf area covered with brown spot; 3= 1-10% leaf area covered with  
251 lesions; 5= 11- 20% leaf covered with brown lesions; 7= 21-50% brown lesions; 9=  $\geq$ 51% leaf  
252 area infected). The percent severity index (PSI) was calculated by Eq. (1):

253  
254 
$$\text{PSI} = \frac{\text{Sum of all rating of infected leaves per pot}}{\text{Total no.of leaves observed per pot} \times \text{maximum disease grade}} \times 100 \dots\dots\dots (1)$$
  
255

## 256 **2.6 Assessment of leaf area**

257 Leaf area (LA) was calculated at 180 DAP by selecting five leafs per plant randomly. The length  
258 and breadth were measured by using leaf area constant  $K = 0.6454$  (Rao et al., 1994).

259 
$$\text{Leaf area per plant} = \text{Length of leaf} \times \text{breadth of leaf} \times K (06454) \dots\dots\dots \text{Eq. (2)}$$

## 260 **2.7. Assessment of physiological parameters**

261 Transpiration rate ( $T_N$ ) net photosynthetic rate ( $P_N$ ), and stomatal conductance ( $g_s$ ) were  
262 estimated at 150 and 180 days after planting (DAP). The tip of the fresh, fully expanded leaves  
263 was placed in a portable Infra-Red Gas Analyzer of photosynthetic system (IRGA) (LICOR  
264 6400, Lincoln, Nebraska, USA). The gas analyzer was calibrated at zero for every half an hour  
265 during the measurement period and the data of each treatment were measured thrice.

## 266 **2.8. Assessment of phytochemical contents**

267 The leaf samples of 150 and 180 DAP were collected for the quantitative assessment of essential  
268 leaf constituents, and the rhizome constituents were measured after completion of the harvesting  
269 period by using UV/VIS- spectrophotometer (UV-Pharma Spec 1600, Shimadzu, Japan).

### 270 **2.8.1. Extraction of chlorophyll and carotenoids contents**

271 The quantitative analysis of specific photosynthetic components such as total chlorophyll and  
272 carotenoid in milligram per gram of fresh leaves tissues were analyzed by following the  
273 technique of Musheer et al. (2019). One gram of fresh leaf was crushed in 5 ml of 99.9% (v/v)  
274 acetone using mortar and pestle and the suspension was filtered through Whatman filter paper  
275 number 1. The final filtrate volume was made up to 10 ml by adding acetone, followed by  
276 centrifugation at 15,000 rpm for 10 min at 10 °C. Before recording the new absorbance reading  
277 at a particular wavelength, the absorbance reading must be calibrated at zero value by using  
278 blank solvents (99.9% acetone). Absorbance for chlorophylls was measured at 645 & 663nm and  
279 carotenoid at 480 & 510 nm using UV/VIS- spectrophotometer (UV-Pharma Spec 1600,  
280 Shimadzu, Japan).

281

$$282 \text{ Total chlorophyll a + b } \left( \frac{\text{mg}}{\text{g}} \text{ fresh tissues} \right) = \frac{20.2(\text{O.D.}645)+8.02(\text{O.D.}663) \times V}{1000 \times W} \dots\dots (3)$$

$$283 \text{ Carotenoids (mg/g fresh tissues)} = \frac{7.6(\text{O.D.}480) - 1.49(\text{O.D.}510) \times V}{L \times 1000 \times W} \dots\dots\dots (4)$$

284

285 where,

286 V = Final volume of chlorophyll extract in 99.9% acetone.

287 W = Fresh weight of leaf tissue.

288 O.D = Optical density at a given wavelength.

289 L= Length of light path (1cm).

290

### 291 **2.8.2. Extraction of total phenol content**

292 Total phytophenol was estimated in 1g of fresh leaf pieces boiled with 10 ml of 99.9% (v/v)  
293 acetone on a water bath for 10 minutes. Then, solution was allowed to centrifuge at 5000 rpm for  
294 20 min at 25<sup>0</sup>C. One ml supernatant was reacted with 1ml Folins reagent and 2ml of 20% sodium  
295 carbonate to form the blue color, followed by boiling for five minutes. The final volume was  
296 adjusted up to 25ml by adding distilled water and the maximum absorbance of the blue-colored  
297 solution was read at 590 nm wavelengths.

### 298 **2.8.3. Estimation of rhizome pigments**

299 Curcumin and oleoresin were extracted by dissolving 1g rhizome powder in 10 ml 99.9% v/v and  
300 kept overnight at room temperature. The filtered solution was diluted up to 10<sup>3</sup> ml with acetone.  
301 The curcumin was quantified by recording absorbance reading at 425nm wavelength, while  
302 Oleoresin was detected in an air-dried solution. The oleoresin and curcumin contents were  
303 calculated using Eqs. (4) & (5) (Singh 2017; AOAC 1975):

304  
305 Oleoresin content = 
$$\frac{(\text{Weight of empty beaker} - \text{Weight of beaker with air-dried oleoresin}) \times 100}{10\text{g weight of turmeric powder}} \dots (5)$$

306  
307  
308 Total curcumin = 
$$\frac{0.0025 \times \text{Absorbance at 425 nm} \times \text{volume made up to 100 ml}}{0.42 \times \text{weight of sample} \times 1000} \dots (6)$$

309  
310 Absorbance of standard solution of curcumin 0.25g/L at 425 nm = 0.42.

## 311 312 **2.9. Data Analysis**

313 The data were statistically analyzed by applying two-way ANOVA at significant level P≤0.05  
314 using R i386 3.4.1 and SPSS 16.0 software.

## 315 **3. Results**

### 316 **3.1 Morphological and molecular characteristic of pathogen and biocontrol agents**

#### 317 **3.1.1 *Colletotrichum gloeosporioides***

318 Morphologically, *Colletotrichum* sp. has showed abundant aerial mycelium by forming  
319 concentric pattern and ashy colony after incubation of seven days at 27±1°C. Microscopically,  
320 each conidium was observed to be in the fusiform shape. Conidium has centrally placed large oil  
321 globules. The high number of sporulation in culture was recorded after 12 hours of maintenance  
322 in light and dark conditions alternatively.

#### 323 **3.1.2 *Trichoderma viride***

324 *Trichoderma viride* was colonized up to 90mm diameter in culture plate after incubation. The  
325 colony's color was observed fairly translucent or watery white with concentric halos.  
326 Observation with compound microscope of 100X resolution revealed microscopic structures  
327 such as frequently branched conidiophores; paired, flask-shaped phialides; and globose-shaped  
328 conidia. The opposite side of the culture media was pigmented with pale yellow color due to  
329 release of some non-volatile compounds.

#### 330 **3.1.3 *Trichoderma harzianum***

331 The cultural plate growth of *Trichoderma harzianum* was measured 8.5cm. The colony growth  
332 was found quite slow. Initially, the aerial mycelium growth media appeared white and then  
333 acquired green, yellow shades due to abundant conidial production. Microscopically,  
334 conidiophore was observed to be branched frequently and verticillately arranged, phialides were  
335 ampuliform- convergent and conidia was sub-globous to ellipsoid in shape. The reverse side of  
336 the culture plate has exhibited intense yellow to dark orange pigmentation in media.

### 337 **3.1.4 *Trichoderma virens***

338 The entire plate was covered with growth and appeared as cottony, fluffy, fringed-aerial,  
339 floccose mycelium and dark green in color. Conidiophores appeared rarely branched; phialides  
340 were lageniform, convergent type; and conidia were sub cylindrical to ovoid shape.

341 The purification of new molecularly identified complete genomic sequences was  
342 achieved by eliminating the primer residue using Bioedit software. Thereafter, BLAST analysis  
343 has revealed 99-100% genome homology of *C. gloeosporioides*, *T. viride*, *T. harzianum* and *T.*  
344 *virens* with the existing database of NCBI. The confirmed nucleotide database of each isolate  
345 was registered in the Gene Bank of NCBI and the accession numbers were acquired for *C.*  
346 *gloeosporioides*, *T. viride*, *T. harzianum* and *T. virens*, as AMUCG1 (MK765035), AMU TVI1  
347 (MK764992), AMU THR1 (MK765028) and AMUTVR2 (MK774725) respectively.

### 348 **3.2. Pathogenicity test**

349 The pathogenicity of *C. gloeosporioides* on turmeric var. sogandham was confirmed at four  
350 different doses of pathogen inoculum @  $1 \times 10^6$ ,  $2 \times 10^6$ ,  $3 \times 10^6$  and  $4 \times 10^6$  cfu/ml, during 2015-  
351 2016. The inoculated plants of 3-4 leaf stage showed infectivity, but its severity varied according  
352 to inoculum dose, as shown in Fig.1. The spore concentrations @  $1 \times 10^6$ ,  $2 \times 10^6$ , and  $3 \times 10^6$   
353 cfu/ml revealed mild severity of leaf spot disease, as characterized by numerous necrotic spots.  
354 However, the inoculum dose @  $4 \times 10^6$  cfu/ml caused fair mortality in the form of severe drying  
355 and wilting in plants. The disease severity and leaf area of inoculated plant were calculated using  
356 Eq. (1) and (2) respectively. The morphological and microscopic characteristics of the re-isolated  
357 pathogen and the pathogen isolated from farmer's field were observed to be identical, which  
358 satisfies the Koch's postulate of pathogenicity.

### 359 **3.3. Physiological and biochemical attributes**

360 In pot trials, the phytochemical and physiological activities of non-infected and infected plants  
361 were enhanced remarkably as presented in table 3 and table 4. The propiconazole @ RD, A.

362 *indica* @ 50ml of 40% v/v and *T. viride* @ 50ml of  $4 \times 10^6$  cfu/ml foliar sprays offered great  
363 enhancement in accessory phytochemicals concentrations: total chlorophyll (a+b)- 3.78, 2.68 and  
364 2.64 mg; carotenoid- 0.9781, 0.9564 and 0.8283 mg; total phytophenol- 74.74, 70.59 and  
365 68.24 $\mu$ g; and oleoresin 8.585, 7.868 and 7.659 %, in inoculated plants. However, improvement in  
366 curcumin contents was non-significant in each treatment (Table3). Subsequently, the  
367 physiological elements were recorded as  $A_N$  0.1882, 0.1789 and 0.1772  $g\ m^{-2}\ day^{-1}$ ;  $T_N$  3.91, 3.29  
368 and 3.25  $mmol\ m^{-2}\ s^{-1}$ ;  $g_s$  3.15, 2.64 and 1.62  $mmol\ m^{-2}\ s^{-1}$ ; and  $P_N$  1.46, 0.9852 and 0.9847  $\mu mol$   
369  $m^{-2}\ s^{-1}$ , with high values in inoculated plants with respect to the above three treatments over  
370 control (Table 4). After one-year pot trial, the efficacy of these treatments were further noticed  
371 in the enhancement of physiological and phytochemical characteristics of naturally infected  
372 plants under open field conditions for two successive years (Table 6 and Table 7). Amongst the  
373 fungicides, biocontrol agents and phytoextracts, propiconazole @ RD, *T. viride* and *A. indica*  
374 were found most efficient to improve the essential physiological and phytochemical traits during  
375 the field trails.

376 The treatments have noticeably improved the plant health by increasing the quantity of  
377 chlorophyll carotenoid and phytophenol content, which is linked to trigger the defense reaction  
378 of leaf spot bio-stress in infected plants for their survival. Hence, the increased quantity of photo-  
379 chemicals has resulted better photosynthetic performance. Propiconazole, *A. indica* and *T. viride*  
380 sprays were found most efficient in inducing physio-biochemical tolerance against necrotic spots  
381 under both pot and field conditions. The lower disease incidence has safeguarded the proper  
382 mechanism of opening and closure of stomata, which showed good link with enhanced stomatal  
383 conductance, photon capturing in mesophyll cells, diffusion of atmospheric  $CO_2$  into intercellular  
384 matrixes, water balance in plants via transpiration and photosynthesis over control.

385 Among all the treatments, propiconazole (HRD), *A. indica* and *T. viride* were caused  
386 maximum suppression to leaf spot severity and increase the healthy leaf area of inoculated  
387 turmeric plants during 2016-2019 succeeding years of cropping seasons. In pots experiment,  
388 after sprays of propiconazole (HRD) > *T. viride* > *A. indica*, the disease incidence was recorded  
389 very low at every spray (14.76, 18.19 & 23.21%) > (18.26, 23.45 & 28.75%) > (19.16, 27.46 &  
390 31.49%), whereas the average of leaf area index was noticed to be enhanced (2.58, 3.70 & 4.28) >  
391 (1.72, 2.93 & 3.58) > (1.59, 2.64, 3.21) in presence of pathogenic infection (Fig.2). Moreover,  
392 under field conditions foliar application of propiconazole HRD > *T. viride* > *A. indica* were also

393 found highly effective to reduce the leaf spot severity (31.35%, 43.27% and 44.32%), and to  
394 increase leaf area index (4.63, 4.15 and 3.51) in first year trial. However, in the second year, the  
395 leaf spot severity was decreased (29.54%, 41.56% and 44.21%) but the leaf area index was  
396 improved further (4.67, 4.21 and 3.58) over control (Fig. 3). Hence, propiconazole at RD, *T.*  
397 *viride* and *A. indica* treatments have shown low disease intensity and maximum enhancement of  
398 physio-biochemical tolerance of infected plants compared to other treatments under both  
399 polyhouse (Fig 2) and field (Fig. 3) conditions. Thus, these treatments can be used in integrated  
400 disease management (IDM) practices for the protection of crop and improvement of crop physio-  
401 biochemistry.

#### 402 **4. Discussion**

403 The present study has evaluated the effects of fungicides, biocontrol agents and phytoextracts  
404 agents on the physiological and biochemical mechanisms in plants to increase their tolerance  
405 level under stress conditions of the polyhouse and field. The pathogen inoculation with micro-  
406 environment interaction could also complement the field selection under varied conditions of  
407 environment (include both pathogenic stress and environment constrains). Therefore, these  
408 treatments caused physio-biochemical variations in the treated and non-treated plants to  
409 regenerate tolerant line against pathogenic stress. Accordingly, the influence of physio-  
410 biochemical tolerance in plants can be classified into primary and secondary categories: the  
411 primary offers defense mechanisms in plants against biological and environmental stress, while  
412 the secondary improves growth characteristics to meet the demand of successful cultivation.  
413 Though many techniques have been developed to induce tolerance in plants, induction of phyto-  
414 physio-biochemical tolerance by foliar application of fungicide, biocontrol agents and  
415 phytoextracts is a new approach. The plant plasticity was modulated by the main physiological  
416 and biochemical processes to increase the plant tolerance against pathogen (Oh et al., 2009a and  
417 Oh et al., 2009b). Some plants develop thick cuticular layer in the above-ground part (stem and  
418 leaves), which leads to reduce the transpiration rate and maintain water turgor (El Ghazali 2020).

419 The disease density of the entire surface of turmeric leafs was recorded high under the  
420 influence of manual or natural high inoculum pressure of *Colletotrichum* sp. pathogen during  
421 polyhouse and field trials. In India, the leaf spot disease of turmeric has been found a major  
422 limiting factor in rhizome production (Kangjam et al. 2017). Therefore, the current study shows  
423 the isolation of *C. gloeosporioides* from the infected leafs of turmeric and *Trichoderma* species

424 from turmeric's rhizosphere. Thereafter, the pathogenicity of *C. gloeosporioides* on turmeric  
425 plants were performed at different inoculum loads under polyhouse condition. The present  
426 findings support those of Tapia-Tussell et al. (2008); Cai et al. (2009); Sekhar et al. (2017);  
427 Pasuvaraji et al. (2013); Boruah et al. (2015). While pathogenicity elicits quick and continuous  
428 changes in genes regulation in response to physio-biochemical functions, the physio-biochemical  
429 traits play a vital role in shaping the plant responses to environment. The plasticity of the plants  
430 is associated with the accumulation of bioactive molecules that increase the tolerance to stresses  
431 by modulating the main physiological and biochemical processes. The efficacy of foliar  
432 application of fungicides, biocontrol agents and phytoextracts was expanded to improve the  
433 improve the plant physio-biochemical traits of infected and non-infected turmeric plants under  
434 polyhouse conditions. Subsequently, the treatment efficiency was checked on such plants that  
435 received natural infestation of pathogen by air or soil borne inocula under field during 2017-  
436 2019. The experiment has demonstrated that the foliar application of these treatments could  
437 effectively cure the disease and strengthen the physio-biochemical mechanisms. Several  
438 researches have reported that the *Colletotrichum* sp. infections on phylloplane of host plants  
439 showed negative impact on various physiological responses of plants, such as gaseous exchange,  
440 transpiration rate and photosynthesis (Kozlowski et al. 2009; Lobato et al. 2010; Guerra et al.  
441 2014). Castrol et al. (2016) and Alves et al. (2011) reported that *Colletotrichum* sp. infected leaf  
442 was unable to carry water, solutes and other photosynthates due to the death of tissues or release  
443 of toxin. Thus, the stress of pathogenic infection has caused reduction in osmotic pressure and  
444 transpiration rate, by limiting the fixation of CO<sub>2</sub> in mesophyll cells. However, the positive  
445 impact of fungicides, biocontrol agents and phytoextracts on the reduction of *C. gloeosporioides*  
446 infection and improvement of physio-biochemical characteristics on turmeric or other host plants  
447 is unique finding of the present study. Good health of plant was attributed to improved  
448 physiological characteristics, contributed by enhanced phytochemical synthesis (Dallagnol et al.  
449 2015). The present study has demonstrated the positive impact of each treatment in the  
450 improvement of plant's physiological response, biochemical constituents and reduction of  
451 disease rate under both polyhouse and field conditions of turmeric plants. The treatments were  
452 noted to increase the existing concentration of chlorophyll and carotenoids pigments, which have  
453 capacity to capture light in antenna complex through Photosystem II. The increase of photo-  
454 pigments led to increase the photosynthetic rate because they serve as the prime source to

455 activate the photosynthetic gene. Nie et al. (2013) reported that higher circulation of organic  
456 carbon into roots system could raise the biomass and diameter of root. Van der Kooi et al. (2016)  
457 observed enhancement of photosynthetic machinery by the elevation of intercellular CO<sub>2</sub>  
458 concentration in mesophyll cells. However, the impact of each treatment on phytophenol  
459 accumulation was significant to activate the plant defense mechanism in the presence of  
460 inoculum pressure. Thus, the plant's phenol-content had also played great role in the productivity  
461 upgradation. Moreover, these treatments not only immune the plants for sustaining survival  
462 under stressed environmental conditions but also secure all vital machinery of plants circulating  
463 on normal path. Hence, the present treatments were proved to be promising to control the  
464 pathogenicity of *C. gloeosporioides* and to enhance the physio-biochemical traits by increasing  
465 immunity of turmeric plants against the pathogen. Jagtap et al. (2013) reported that three foliar  
466 sprays of propiconazole, *T. viride* and extracts of *Pentalonia logifolia* on turmeric plants had  
467 reduced the severity of leaf spots caused by *C. capsici* grown under pots. Yadav *et al.* (2017)  
468 also achieved the best results with foliar sprays of propiconazole and neem leaves extracts in  
469 minimizing the disease severity caused by same pathogen *C. capsici*. Currently, the fungicidal  
470 application on plants under both biotic and abiotic disease pressure was found non-acceptable  
471 due to persistence of toxic residual effects on environment or built-up resistance in pathogen  
472 over excessive application. Conversely, phytoextracts and biocontrol agents would be safer and  
473 acceptable in agricultural system for curing soil and foliar disease, besides contributing to  
474 increasing the crop productivity without any hazardous effects on plants or ecological  
475 biodiversity. The authors' previous study (Musheer et al. 2019) determined the best result of  
476 propiconazole, *T. viride* and neem cake foliar sprays in declining the turmeric leaf spots disease  
477 incited by *C. gloeosporioides* and in enhancing the plant height, rhizome girth, fresh rhizome  
478 weight, dry rhizome weight, photopigments of leaves and curcumin content of rhizome.

## 479 **5. Conclusion**

480 The main aim of this study was to understand the effects of fungicides, biocontrol agents and  
481 botanical extracts on plant physiological and biochemical activities, which were noticed to be  
482 mainly associated with normal plant growth and development under the influence of pathogenic  
483 infestation. *Curcuma longa* leaf necrosis greatly affects the rhizome productivity due to death of  
484 leaf tissues; thereby plants lose normal physiological and phytochemical functioning at high rate



485 of disease density. Therefore, suitable fungicides, botanical extracts and biocontrol agents were  
486 used on phyllosphere region of plants to minimize the severity of disease and improve the plant's  
487 physiological machinery by enhancing the photo-pigmentation like chlorophyll and carotenoid as  
488 well as defense molecules. All treatments were found to strengthen the plant growth over control.  
489 From the trails, we concluded that propiconazole, *A. indica* and *T. viride* have high potential in  
490 managing necrotic brown blotches on leaves under both polyhouse and field conditions. Among  
491 all treatments, these three revealed the best results to improve the plant's physio-biochemical  
492 defense mechanisms and stability of survival. Use of chemical controls to pathogen etiology is  
493 often difficult and costly, and it leads to bio-resource disintegration. Moreover, excessive  
494 dependency on synthetic chemicals for the management of pathogen can cause environmental  
495 pollution, and being non-biodegradable causes toxic residual effects in soil, water table, humans  
496 and animals. Hence, biocontrol agents and extracts of plants were added in integrated disease  
497 management modeling. However, botanicals and biocontrol extracts have showed significant  
498 results in the improvement phyto-physio-biochemical traits against *C. gloeosporioides* over  
499 control. Hence, early detection of pathogen infection and proper utilization of botanical extracts,  
500 biocontrol agents and fungicides at lower than recommended dose would be effective in inducing  
501 plant tolerance by improving physio-biochemical traits; this suppresses the disease severity  
502 before crop crosses the level of economic threshold where all disease control measures fail. This  
503 is an attractive alternative approach for the development of biotic stress tolerance in herbaceous  
504 plants. However, the mechanisms of each physio-biochemical elements require extensive study  
505 on how they respond to stresses.

## 506 **References**

- 507 Agrios, G. N., 2005. Plant Pathology, 5th Ed. (922 p). Academic Press: San Diego.
- 508 Albaladejo, I., Egea, I., Morales, B., Flores, F.B., Capel, C., Lozano, R., Bolarin, M.C., 2018.  
509 Identification of key genes involved in the phenotypic alterations of res (restored cell structure  
510 by salinity) tomato mutant and its recovery induced by salt stress through transcriptomic  
511 analysis. BMC Plant Biol. 18, 213.
- 512 Alves, A. A., Guimaraes, L. M. S., Chaves, A. R. M., DaMatta, F. M., & Alfenas, A. C., 2011.  
513 Leaf gas exchange and chlorophyll a fluorescence of *Eucalyptus urophylla* in response to

- 514 *Puccinia psidii* infection. *Acta Physiologiae Plantarum*, 33(5), 1831–1839.  
515 <https://doi.org/10.1007/s11738-011-0722-z>
- 516 Amalraj, A., Piusb, A., Gopib, S., Gopia, S., 2016. Biological activities of curcuminoids, other  
517 biomolecules from turmeric and their derivatives—A review. *Journal of Traditional and*  
518 *Complementary Medicine* 7(2), 205-233. <https://doi.org/10.1016/j.jtcme.2016.05.005>
- 519 Anandaraj, M., Prasath, D., Kandiannan, K., Zachariah, T. J., Srinivasan, V., Jha, A. K., Singh B.  
520 K., Singh, A. K., Pandey, V. P., Singh, S. P., Shoba, N., Jana, J. C., Kumar, R., & Maheswari,  
521 U., 2014. Genotype by environment interaction effects on yield and curcumin in turmeric  
522 (*Curcuma longa* L.). *Industrial Crops and Products*, 53, 358–364.  
523 <https://doi.org/10.1016/j.indcrop.2014.01.005>
- 524 Anuradha, U. B., Patil, S. S., Kurubar, A. R., Ramesh, G., & Hiregoudar, S., 2018. Effect of  
525 Integrated Nutrient Management on Growth and Yield of Turmeric (*Curcuma longa* L.) cv.  
526 Salem. *International Journal of Current Microbiology and Applied Sciences* 7(1), 3196-3203.  
527 <https://doi.org/10.20546/ijcmas.2018.701.381>
- 528 AOAC., 1975. Official methods of analysis. 12th Edn. Association of official Agricultural  
529 Chemists, Washington, D.C.
- 530 Bandyopadhyay, A., Datta, K., Zhang, J., Yang, W., Raychaudhuri, S., Miyao, M., Datta, S.K.,  
531 2007. Enhanced photosynthesis rate in genetically engineered indica rice expressing pepc gene  
532 cloned from maize. *Plant Science* 172, 1204-1209.
- 533 Berger, S., Benediktyova, Z., Matous, K., Bonfig, K., Mueller, M. J., Nedbal, L., & Roitsch, T.,  
534 2007a. Visualization of dynamics of plant-pathogen interactions by novel combination of  
535 chlorophyll l fluorescence imaging and statistical analysis: differential effects of virulent and  
536 avirulent strains of *P. syringae* and *oxylipins* on *A. thaliana*. *Journal of Experimental Botany*  
537 58(4), 797–806. <https://doi.org/10.1093/jxb/erl208>
- 538 Berger, S., Sinha, A. K., & Roitsch, T., 2007b. Plant physiology meets phytopathology: plant  
539 primary metabolism and plant-pathogen interactions. *Journal of Experimental Botany* 58(15-16),  
540 4019–4026. <https://doi.org/10.1093/jxb/erm298>

- 541 Bhende, S.S., Jessykutty, P. C., Shrishail, D., Santoshkumar, M., Harish, H.K., & Shruthi, SD.  
542 2013. Studies on growth, yield and economic parameters of kashuri turmeric (*Curcuma*  
543 *aromatica* Salisb.) under organic manuring practices. International Journal of Advancements in  
544 Research & Technology 2(5), 414-420.
- 545 Binalata, K., Thangaswamy, R., Dipali, M., & Kongbrailatpam, D. J., 2017. Evaluation of Plant  
546 extracts, Biocontrol agents and Fungicides against the growth of Turmeric leaf spot pathogen,  
547 *Colletotrichum capsici* under In-vitro condition. Environment & Ecology 35 (2B), 1173-1178.
- 548 Boruah, S., Borah, M., Barman, D., & Dutta, P., 2015. Evaluation of fungicides against leaf spot  
549 of turmeric caused by *Colletotrichum capsici*. International Journal of Plant Protection 8(1), 57-  
550 60. <https://doi.org/10.15740/has/ijpp/8.1/57-60>
- 551 Bezier, A., Lambert, B., Baillieul, F., 2002. Study of defense related gene expression in  
552 grapevine leaves and berries infected with *Botrytis cinerea*. Eur. J. Plant Pathol. 108, 111–120.
- 553 Cai, L., Hyde, K. D., Taylor, P. W. J., Weir, B. S., Waller, J. M., Abang, M. M., Zhang, J. Z.,  
554 Yang, Y. L., Phoulivong, S., Liu, Z. Y., Prihastuti, H., Shivas, R. G., McKenzie, E. H. C., &  
555 Johnston, P. R., 2009. A polyphasic 524 approach for studying *Colletotrichum*. Fungal Diversity  
556 39, 183-204.
- 557 Castro, G. L. S., Júnior, D. D. S., Bueno, A. C. S. O., & Silva, G. B., 2016. Anthracnose in acai  
558 palm leaves reduces leaf gas exchange and chlorophyll a fluorescence. Tropical plant pathology  
559 42(1), 13-20. <https://doi.org/10.1007/s40858-016-0118-0>
- 560 Dallagnol, L. J., Martins, S. C. V., DaMatta, F. M., & Rodrigues, F. Á., 2015. Brown spot  
561 negatively affects gas exchange and chlorophyll a fluorescence in rice leaves. Journal of Tropical  
562 Plant Pathology 40(4), 275–278. <https://doi.org/10.1007/s40858-015-0026-8>
- 563 Dias, C. S., Araujo, L., Alves Chaves, J. A., DaMatta, F. M., & Rodrigues, F. A., 2018. Water  
564 relation, leaf gas exchange and chlorophyll a fluorescence imaging of soybean leaves infected  
565 with *Colletotrichum truncatum*. Plant Physiology and Biochemistry 127, 119–128.  
566 <https://doi.org/10.1016/j.plaphy.2018.03.016>

- 567 El Ghazali, G.E.B., 2020. *Suaeda vermiculata* Forssk. ex J.F. Gmel.: structural characteristics  
568 and adaptations to salinity and drought: a review. *Intermt. J. Sci.* 9, 28–33.
- 569 Ethan J. Andersen, Shaukat Ali, Emmanuel Byamukama, Yang Yen, Madhav P. Nepal Genes  
570 (Basel) 2018. Disease Resistance Mechanisms in Plants 9(7), 339. doi: 10.3390/genes9070339.  
571 PMID: PMC6071103
- 572 Guerra, A. M. N de M., Rodrigues, F. Á., Lima, T. C., Berger, P. G., Barros, A. F., & Silva, Y.  
573 C. R. da., 2014. Capacidade fotossintética de plantas de algodoeiro infectadas por ramulose e  
574 supridas com silício. *Bragantia* (Photosynthetic capacity of cotton plants infected by ramulose  
575 and supplied with silicon. *Bragantia*). 73(1),50–64. <https://doi.org/10.1590/brag.2014.010>
- 576 He, Q., McLellan, H., Boevink, P.C., Birch, P.R.J., 2020. All Roads Lead to Susceptibility: the  
577 many modes of action of fungal and oomycete intracellular effectors. *Plant Communications* 1,  
578 100050
- 579 Hegde, R., Tippeshi, Y. C. L., & Rajalaxmi, K. S., 2014. Antifungal activity of plant extracts on  
580 *Colletotrichum gloeosporioides* infecting *Jatropha curcas*. *The Bioscan*, 9(1), 283-286.
- 581 Hudge, B. V. & Ghugul, S. A., 2010. Losses in yield and quality of turmeric due to leaf spot  
582 disease caused by *Colletotrichum capsici*. *International Journal of Agricultural Sciences*, 6(1),  
583 43-45.
- 584 Hung, R., Lee, S., Bennett, J. W., 2013. *Arabidopsis thaliana* as a model system for testing the  
585 effects of *Trichoderma* volatile organic compounds. *Fungal Ecology* 6, 19–26.
- 586 Israel Pagan and Fernando Garcia-Arenal 2018. Tolerance to Plant Pathogens: Theory and  
587 Experimental Evidence. *Int J Mol Sci.* 19(3), 810. doi: 10.3390/ijms19030810, PMID:  
588 PMC5877671
- 589 Jagtap, G. P., Mali, A. K., & Utpal, D., 2013. Bioefficacy of fungicides, bio-control agents and  
590 botanicals against leaf spot of turmeric incited by *Colletotrichum capsici*. *African Journal of*  
591 *Microbiological Research* 7(18), 1865-1873. <https://doi.org/10.5897/ajmr12.2252>
- 592 Jones, J.D., Dangl, J.L., 2006. The plant immune system. *Nature* 444, 323–329.

- 593 Kendre, V. P., Ingle, R. W., Deshmukh, V. V., & Vyavhare, G. F., 2017. Integrated management  
594 of leaf blight caused by *Colletotrichum gloeosporioides* of *Piper longum*. International Journal  
595 of Chemical Studies 5(4), 1680-1683.
- 596 Koch, K.G., Chapman K., Louis, J., Heng-Moss, T. and Sarath, G., 2016. Plant Tolerance: A  
597 Unique Approach to Control Hemipteran Pests. Front. Plant Sci. 7,1363. doi:  
598 10.3389/fpls.2016.01363
- 599 Kosova, K., Vitamvas, P., Urban, M.O., Prasil, I.T., Renaut, J., 2018. Plant abiotic stress  
600 proteomics: the major factors determining alterations in cellular proteome. Front. Plant Sci. 9,  
601 122.
- 602 Kozłowski, L. A., Simoes, D. F. M., Sousa, C. D., & Trento, M., 2009. Physiological effects of  
603 strobilurins F 500 in the growth and yield of bean. Revista Academica Ciencias Agrarias e  
604 Ambientais 7, 41-54.
- 605 Kumar, A., Shukla, R., Singh, P., Prasad, C. S., & Dubey, N. K., 2008. Assessment of *Thymus*  
606 *vulgaris* L. essential oil as a safe botanical preservative against post-harvest fungal infestation of  
607 food commodities. Food Science Emerg 4, 575-580.
- 608 Li, Y., Sun, R., Yu, J., Saravanakumar, K., & Chen, J., 2016. Antagonistic and Biocontrol  
609 Potential of *Trichoderma asperellum* ZJSX5003 against the maize stalk rot pathogen *Fusarium*  
610 *graminearum*. Indian Journal of Microbiology 56(3), 318–327. [https://doi.org/10.1007/s12088-](https://doi.org/10.1007/s12088-016-0581-9)  
611 016-0581-9
- 612 Lobato, A. K. S., Coimbra, G. K., Neto, M. A. M., Costa, R. C. L., Santos, F. B. G., Oliveira N.  
613 C. F., Luz, L. M., Barreto, A. G. T., Pereira, B. W. F., Alves, G. A. R., Monteiro, B. S., &  
614 Marochio, C. A., 2009c. Protective action of silicon on water relations and photosynthetic  
615 pigments in pepper 573 plants induced to water deficit. Research Journal of Biological Sciences,  
616 4, 617-623.
- 617 Lobato, A. K. S., Gonçalves-Vidigal, M. C., Vidigal Filho, P. S., Andrade, C. A. B., Kvitschal,  
618 M. V. & Bonato, C. M., 2010. Relationships between leaf pigments and photosynthesis in  
619 common bean plants infected by anthracnose. New Zealand Journal of Crop and Horticultural  
620 Science 38(1), 29-37. <https://doi.org/10.1080/01140671003619308>

- 621 Lopez-Mondéjar, R., Ros, M., & Pascual, J. A., 2011. Mycoparasitism-related genes expression  
622 of *Trichoderma harzianum* isolates to evaluate their efficacy as biocontrol agent. Biological  
623 Control 56(1), 59-66. <https://doi.org/10.1016/j.biocontrol.2010.10.003>
- 624 Makino, A., and Mae, T., 1999. Photosynthesis and plant growth at elevated levels of CO<sub>2</sub>. Plant  
625 Cell Physiol. 40, 999–1006. doi: 10.1093/oxfordjournals.pcp.a029493
- 626 Mishra, R. S., & Pandey, V. P., 2015. Management of leaf spot of turmeric caused by  
627 *Colletotrichum capsici* through fungicides. Journal of Spices and Aromatic Crops 24(1), 60-69.
- 628 Modupeola, T. O. & Olaniyi, J. O., 2015. Effects of nitrogen (N) fertilizer and plant spacing on  
629 the growth and rhizome yield of turmeric (*Curcuma longa* L.) in Ibadan South-West Nigeria.  
630 International Journal of Plant Science and Ecology 1(4), 149-154.
- 631 Musheer, N., Ashraf, S., & Chaudhary, A., 2019. Efficacy of fungicides, bioagents and organic  
632 manure against *Colletotrichum gloeosporioides* on Growth and Yield of Turmeric (*Curcuma*  
633 *longa* Linn.). Annals of Plant Protection 27(1), 95-101. <https://doi.org/10.5958/0974->  
634 0163.2019.00019.3
- 635 Nie, M., Lu, M., Bell, J., Raut, S., & Pendall, E., 2013. Altered root traits due to elevated CO<sub>2</sub>: a  
636 meta-analysis. Global Ecology and Biogeography 22(10), 1095–1105.  
637 <https://doi.org/10.1111/geb.12062>
- 638 Oh, M. M., Carey, E. E., and Rajashekar, C. B., 2009a. Environmental stresses induce health-  
639 promoting phytochemicals in lettuce. Plant Physiol. Biochem. 47 (7), 578–583.  
640 doi:10.1016/j.plaphy.2009.02.008
- 641 Oh, M. M., Trick, H. N., and Rajashekar, C. B., 2009b. Secondary metabolism and antioxidants  
642 are involved in environmental adaptation and stress tolerance in lettuce. J. Plant Physiol. 166 (2),  
643 180–191. doi:10.1016/j.jplph.2008.04.015
- 644 Pasuvaraji, A., Sevugaperumal, N., 597 & Chandrasekaran, A., 2013. Morphological  
645 characterization and molecular phylogeny of *Colletotrichum capsici* causing leaf spot disease of  
646 turmeric. The Bioscan 8(1), 331-337.

- 647 Polanco, L. R., Rodrigues, F. A., Nascimento, K. J. T., Cruz, M. F. A., Curvelo, C. R. S.,  
648 DaMatta, F. M., & Vale, F. X. R., 2014. Photosynthetic gas exchange and antioxidative system  
649 in common bean plants infected by *Colletotrichum lindemuthianum* and supplied with silicon.  
650 *Tropical Plant Pathology* 39(1), 35–42. <https://doi.org/10.1590/s1982-56762014000100005>
- 651 Raia, K. Manoj, Kaliaa K. Rajwant, Singha, Rohtas, Gangolaa P. Manu, Dhawana A.K., 2011.  
652 Developing stress tolerant plants through in vitro selection—An overview of the recent progress  
653 *Environmental and Experimental Botany* 71, 89–98. doi:10.1016/j.envexpbot.2010.10.021
- 654 Ramakrishnan, T. S., 1954. Leaf spot disease of turmeric (*Curcuma longa* L.) caused by  
655 *Colletotrichum capsici* (Syd.) Buil and Bisby. *Indian Phytopathology* 7, 111–117.
- 656 Rao, P. V., A. M. Rao, M.R. and P.S. Rao (1994). Leaf area estimation by linear measurements  
657 in turmeric. *Ann. agric. Res.*, 15(2): 231-233.
- 658 Resende, R. S., Rodrigues, F. Á., Cavatte, P. C., Martins, S. C. V., Moreira, W. R., Chaves, A. R.  
659 M., & DaMatta, F.M., 2012. Leaf gas exchange and oxidative stress in sorghum plants supplied  
660 with silicon and infected by *Colletotrichum sublineolum*. *Phytopathology* 102(9), 892–898.  
661 <https://doi.org/10.1094/phyto-01-12-0014-r>
- 662 Roy, S. S., & Hore, J. K., 2012. Effect of organic manures and microbial inoculants on soil  
663 nutrient availability and yield of turmeric intercropped in arecanut gardens. *Journal of Crop and*  
664 *Weed* 8(1), 90-94.
- 665 Sekhar Y.C., Ahammed S.K., Prasad T.N., Devi R.S., 2017. Identification of *Trichoderma*  
666 species based on morphological characters isolated from rhizosphere of groundnut (*Arachis*  
667 *Hypogaea* L). *International Journal of Science, Environment and Technology* 6 (3), 2056 –  
668 2063.
- 669 Smakowska-Luzan, E., Mott, G.A., Parys, K., Stegmann, M., Howton, T.C., Layeghifard, M.,  
670 Neuhold, J., Lehner, A., Kong, J.X., Grunwald, K., Weinberger, N., Satbhai, S.B., Mayer, D.,  
671 Busch, W., Madalinski, M., Stolt-Bergner, P., Provart, N.J., Mukhtar, M.S., Zipfel, C.,  
672 Desveaux, D., Guttman, D.S., Belkhadir, Y., 2018. An extracellular network of Arabidopsis  
673 leucine-rich repeat receptor kinases. *Nature* 561, E8.

- 674 Singh, A., & Avupati, V. R., 2017. Development and Validation of UV-Spectrophotometric  
675 method for the Estimation of Curcumin in Standardised Polyherbal Formulations. *Journal Young*  
676 *Pharmacists* 9(4), 491-495. <https://doi.org/10.5530/jyp.2017.9.96>
- 677 Singh, S., Joshi, R. K., & Nayak, S., 2013. Identification of elite genotypes of turmeric through  
678 agroclimatic zone based evaluation of important drug yielding traits. *Industrial Crops and*  
679 *Products*, 43, 165–171. <https://doi.org/10.1016/j.indcrop.2012.07.006>
- 680 Tan, K.C., Oliver, R.P., Solomon, P.S., Moffat, C.S., 2010. Proteinaceous necrotrophic effectors  
681 in fungal virulence. *Funct.l Plant Biol.* 37, 907–912.
- 682 Tapia-Tussell, R., Quijano-Ramayo, A., Cortes-Velazquez, A., Lappe, P., Larque-Saavedra, A.,  
683 & Perez-Brito, D., 2008. PCR-Based detection and characterization of the fungal pathogens  
684 *Colletotrichum gloeosporioides* and *Colletotrichum capsici* causing anthracnose in papaya  
685 (*Carica papaya* L.) in the Yucatan Peninsula. *Molecular Biotechnology* 40(3), 293-298.  
686 <https://doi.org/10.1007/s12033-008-9093-0>
- 687 Thompson, M., Gamage, D., Hirotsu, N., Martin, A. & Seneweera, S. 2017. Effects of elevated  
688 Carbon dioxide on photosynthesis and carbon partitioning: A perspective on root sugar sensing  
689 and hormonal crosstalk. *Frontiers in Physiology.* 8, 578.  
690 <https://doi.org/10.3389/fphys.2017.00578>
- 691 Van der Kooi, C. J., Reich, M., Löw, M., De Kok, L. J., Tausz, M., 2016. Growth and yield  
692 stimulation under elevated CO<sub>2</sub> and drought: a meta-analysis on crops, *Journal of Environmental*  
693 *and Experimental Botany* 122, 150–157. <https://doi.org/10.1016/j.envexpbot.2015.10.004>
- 694 Vasala, P. A., 2012. Ginger, in *Handbook of Herbs and Spices*, Second Edn (319-335 p.).  
695 Woodhead Publishing.
- 696 Wharton, P. S., & Dieguez-Uribeondo, J., 2004. The biology of *Colletotrichum acutatum*. *Anales*  
697 *del Jardin Botanico de Madrid* 61, 3-22.
- 698 Wu, Y., Deng, Z., Lai, J., Zhang, Y., Yang, C., Yin, B., Zhao, Q., Zhang, L., Li, Y., Yang, C  
699 2009. Dual function of Arabidopsis ATAF1 in abiotic and biotic stress responses. *Cell Res.* 19,  
700 1279–1290.



701 Xing, J., Pan, D., Wang, L., Tan, F., Chen, W., 2019. Proteomic and physiological responses in  
702 mangrove *Kandelia candel* roots under short-term high-salinity stress. *Turk. J. Biol.* 43, 314–325.

703 Yadav, A. L., Ghasolia, R. P., Choudhary, S., & Yadav, V. K., 2017. Exploitation of fungicides  
704 and plant extracts for ecofriendly management of chilli fruit rot disease. *International Journal of*  
705 *Chemical Studies* 5(4), 1632-1634.

706 Zhu, J.K., 2002. Salt and drought stress signal transduction in plants. *Annu. Rev. Plant Biol.* 53,  
707 247–273.

### 708 **Figure captions**

709 **Fig. 1** Virulence effect of *C. gloeosporioides* at different inoculum doses (2015-2016).

710 **Fig. 2** Effect of fungicides, phytoextracts and biocontrol agents foliar application on severity of  
711 leaf-spot and leaf area index of turmeric under polyhouse conditions (2016-2017).

712 **Fig. 3** Effect of fungicides, phytoextracts and biocontrol agents foliar treatment on severity of  
713 leaf-spot and leaf area index of turmeric, under field conditions (2017-2019).

Fig. 1

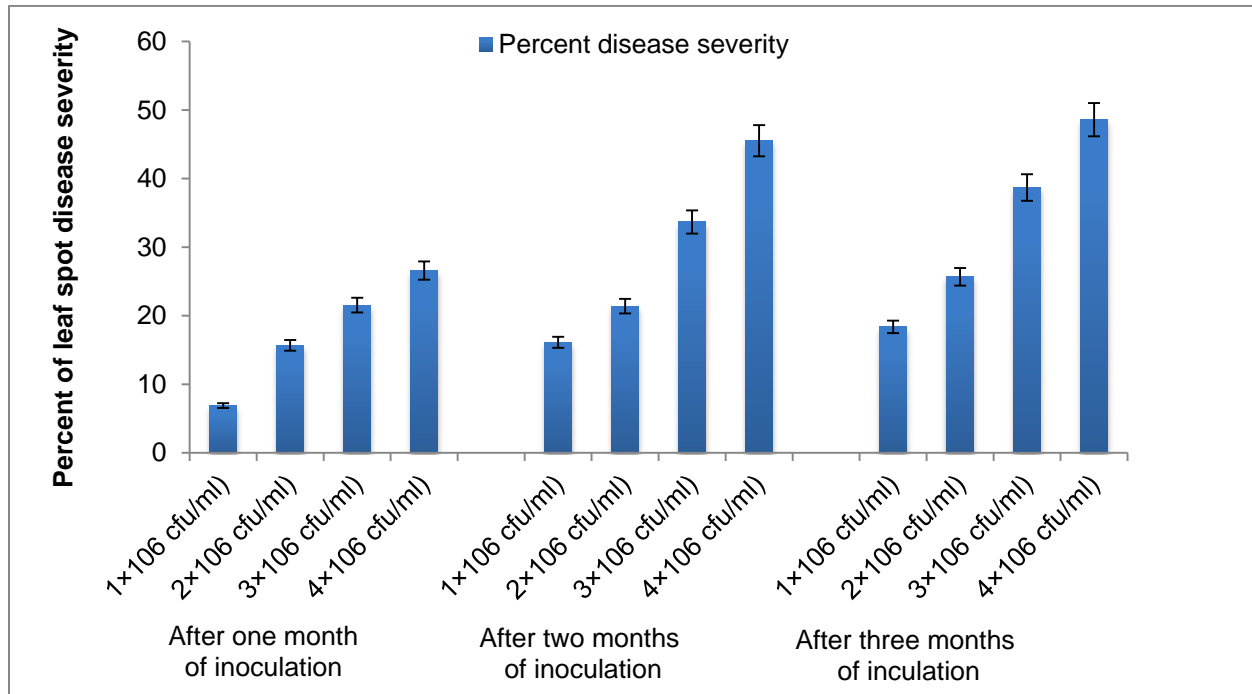

**Fig. 2**

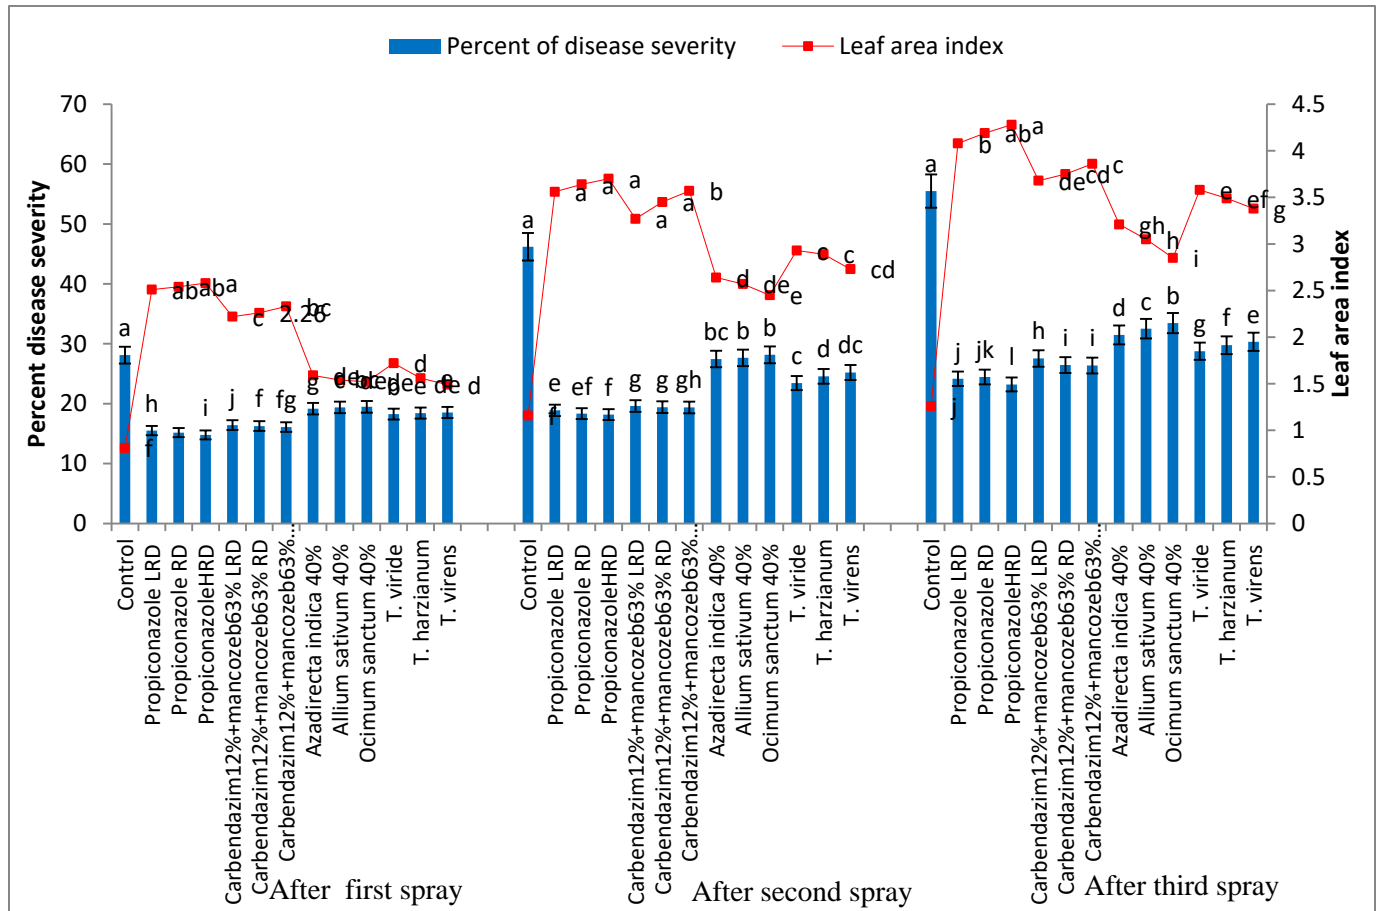

**Fig. 3**

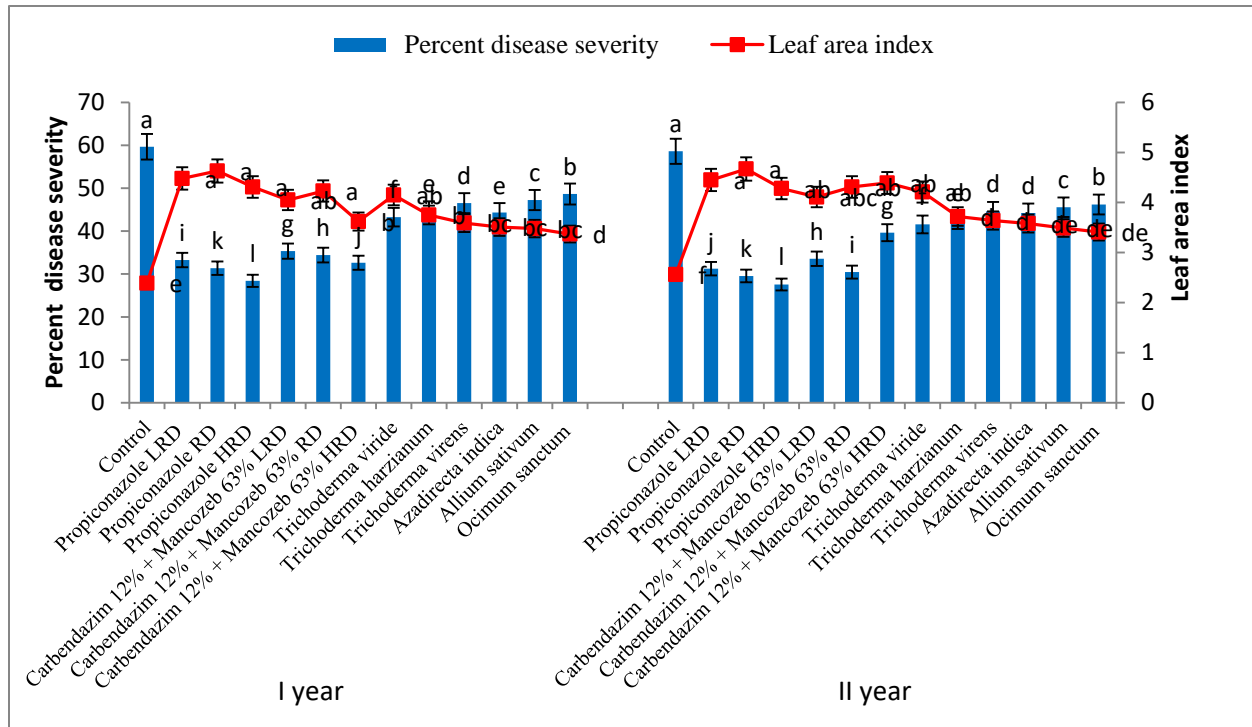

## Parsed Citations

**Agrios, G. N., 2005.** Plant Pathology, 5th Ed. (922 p). Academic Press: San Diego.

Google Scholar: [Author Only Title Only Author and Title](#)

**Albaladejo, I., Egea, I., Morales, B., Flores, F.B., Capel, C., Lozano, R., Bolarin, M.C., 2018.** Identification of key genes involved in the phenotypic alterations of res (restored cell structure by salinity) tomato mutant and its recovery induced by salt stress through transcriptomic analysis. *BMC Plant Biol.* 18, 213.

Google Scholar: [Author Only Title Only Author and Title](#)

**Alves, A. A., Guimaraes, L. M. S., Chaves, A. R. M., DaMatta, F. M., & Alfenas, A. C., 2011.** Leaf gas exchange and chlorophyll a fluorescence of *Eucalyptus urophylla* in response to *Puccinia psidii* infection. *Acta Physiologiae Plantarum*, 33(5), 1831–1839. <https://doi.org/10.1007/s11738-011-0722-z>

Google Scholar: [Author Only Title Only Author and Title](#)

**Amalraj, A., Piusb, A., Gopib, S., Gopia, S., 2016.** Biological activities of curcuminoids, other biomolecules from turmeric and their derivatives-A review. *Journal of Traditional and Complementary Medicine* 7(2), 205-233. <https://doi.org/10.1016/j.jtcm.2016.05.005>

Google Scholar: [Author Only Title Only Author and Title](#)

**Anandaraj, M., Prasath, D., Kandiannan, K., Zachariah, T. J., Srinivasan, V., Jha, A. K., Singh B. K., Singh, A. K., Pandey, V. P., Singh, S. P., Shoba, N., Jana, J. C., Kumar, R., & Maheswari, U., 2014.** Genotype by environment interaction effects on yield and curcumin in turmeric (*Curcuma longa* L.). *Industrial Crops and Products*, 53, 358–364. <https://doi.org/10.1016/j.indcrop.2014.01.005>

Google Scholar: [Author Only Title Only Author and Title](#)

**Anuradha, U. B., Patil, S. S., Kurubar, A. R., Ramesh, G., & Hiregoudar, S., 2018.** Effect of Integrated Nutrient Management on Growth and Yield of Turmeric (*Curcuma longa* L.) cv. Salem. *International Journal of Current Microbiology and Applied Sciences* 7(1), 3196-3203. <https://doi.org/10.20546/ijcmas.2018.701.381>

Google Scholar: [Author Only Title Only Author and Title](#)

**AOAC., 1975.** Official methods of analysis. 12th Edn. Association of official Agricultural Chemists, Washington, D.C.

Google Scholar: [Author Only Title Only Author and Title](#)

**Bandyopadhyay, A., Datta, K., Zhang, J., Yang, W., Raychaudhuri, S., Miyao, M., Datta, S.K., 2007.** Enhanced photosynthesis rate in genetically engineered indica rice expressing *pepc* gene cloned from maize. *Plant Science* 172, 1204-1209.

Google Scholar: [Author Only Title Only Author and Title](#)

**Berger, S., Benediktyova, Z., Matous, K., Bonfig, K., Mueller, M. J., Nedbal, L., & Roitsch, T., 2007a.** Visualization of dynamics of plant-pathogen interactions by novel combination of chlorophyll I fluorescence imaging and statistical analysis: differential effects of virulent and avirulent strains of *P. syringae* and oxylipins on *A. thaliana*. *Journal of Experimental Botany* 58(4), 797–806. <https://doi.org/10.1093/jxb/erl208>

Google Scholar: [Author Only Title Only Author and Title](#)

**Berger, S., Sinha, A. K., & Roitsch, T., 2007b.** Plant physiology meets phytopathology: plant primary metabolism and plant-pathogen interactions. *Journal of Experimental Botany* 58(15-16), 4019–4026. <https://doi.org/10.1093/jxb/erm298>

Google Scholar: [Author Only Title Only Author and Title](#)

**Bhende, S.S., Jessykutty, P. C., Shrishail, D., Santoshkumar, M., Harish, H.K., & Shruthi, SD. 2013.** Studies on growth, yield and economic parameters of kashuri turmeric (*Curcuma aromatica* Salisb.) under organic manuring practices. *International Journal of Advancements in Research & Technology* 2(5), 414-420.

Google Scholar: [Author Only Title Only Author and Title](#)

**Binalata, K., Thangaswamy, R., Dipali, M., & Kongbrailatpam, D. J., 2017.** Evaluation of Plant extracts, Biocontrol agents and Fungicides against the growth of Turmeric leaf spot pathogen, *Colletotrichum capsici* under In-vitro condition. *Environment & Ecology* 35 (2B), 1173-1178.

Google Scholar: [Author Only Title Only Author and Title](#)

**Boruah, S., Borah, M., Barman, D., & Dutta, P., 2015.** Evaluation of fungicides against leaf spot of turmeric caused by *Colletotrichum capsici*. *International Journal of Plant Protection* 8(1), 57-60. <https://doi.org/10.15740/has/ijpp/8.1/57-60>

Google Scholar: [Author Only Title Only Author and Title](#)

**Bezier, A., Lambert, B., Baillieul, F., 2002.** Study of defense related gene expression in grapevine leaves and berries infected with *Botrytis cinerea*. *Eur. J. Plant Pathol.* 108, 111–120.

Google Scholar: [Author Only Title Only Author and Title](#)

**Cai, L., Hyde, K. D., Taylor, P. W. J., Weir, B. S., Waller, J. M., Abang, M. M., Zhang, J. Z., Yang, Y. L., Phoulivong, S., Liu, Z. Y., Prihastuti, H., Shivas, R. G., McKenzie, E. H. C., & Johnston, P. R., 2009.** A polyphasic 524 approach for studying *Colletotrichum*. *Fungal Diversity* 39, 183-204.

Google Scholar: [Author Only Title Only Author and Title](#)

**Castro, G. L. S., Júnior, D. D. S., Bueno, A. C. S. O., & Silva, G. B., 2016.** Anthracnose in acai palm leaves reduces leaf gas exchange and chlorophyll a fluorescence. *Tropical plant pathology* 42(1), 13-20. <https://doi.org/10.1007/s40858-016-0118-0>

Google Scholar: [Author Only Title Only Author and Title](#)

Dallagnol, L. J., Martins, S. C. V., DaMatta, F. M., & Rodrigues, F. Á., 2015. Brown spot negatively affects gas exchange and chlorophyll a fluorescence in rice leaves. *Journal of Tropical Plant Pathology* 40(4), 275–278. <https://doi.org/10.1007/s40858-015-0026-8>

Google Scholar: [Author Only](#) [Title Only](#) [Author and Title](#)

Dias, C. S., Araujo, L., Alves Chaves, J. A., DaMatta, F. M., & Rodrigues, F. A., 2018. Water relation, leaf gas exchange and chlorophyll a fluorescence imaging of soybean leaves infected with *Colletotrichum truncatum*. *Plant Physiology and Biochemistry* 127, 119–128. <https://doi.org/10.1016/j.plaphy.2018.03.016>

Google Scholar: [Author Only](#) [Title Only](#) [Author and Title](#)

El Ghazali, G.E.B., 2020. *Suaeda vermiculata* Forssk. ex J.F. Gmel.: structural characteristics and adaptations to salinity and drought: a review. *Intermt. J. Sci.* 9, 28–33.

Google Scholar: [Author Only](#) [Title Only](#) [Author and Title](#)

Ethan J. Andersen, Shaukat Ali, Emmanuel Byamukama, Yang Yen, Madhav P. Nepal *Genes (Basel)* 2018. Disease Resistance Mechanisms in Plants 9(7), 339. doi: 10.3390/genes9070339. PMID: PMC6071103

Google Scholar: [Author Only](#) [Title Only](#) [Author and Title](#)

Guerra, A. M. N de M., Rodrigues, F. Á., Lima, T. C., Berger, P. G., Barros, A. F., & Silva, Y. C. R. da., 2014. Capacidade fotossintética de plantas de algodoeiro infectadas por ramulose e supridas com silício. *Bragantia* (Photosynthetic capacity of cotton plants infected by ramulose and supplied with silicon. *Bragantia*). 73(1), 50–64. <https://doi.org/10.1590/brag.2014.010>

Google Scholar: [Author Only](#) [Title Only](#) [Author and Title](#)

He, Q., McLellan, H., Boevink, P.C., Birch, P.R.J., 2020. All Roads Lead to Susceptibility: the many modes of action of fungal and oomycete intracellular effectors. *Plant Communications* 1, 100050

Google Scholar: [Author Only](#) [Title Only](#) [Author and Title](#)

Hegde, R., Tippeshi, Y. C. L., & Rajalaxmi, K. S., 2014. Antifungal activity of plant extracts on *Colletotrichum gloeosporioides* infecting *Jatropha curcas*. *The Bioscan*, 9(1), 283-286.

Google Scholar: [Author Only](#) [Title Only](#) [Author and Title](#)

Hudge, B. V. & Ghugul, S. A., 2010. Losses in yield and quality of turmeric due to leaf spot disease caused by *Colletotrichum capsici*. *International Journal of Agricultural Sciences*, 6(1), 43-45.

Google Scholar: [Author Only](#) [Title Only](#) [Author and Title](#)

Hung, R., Lee, S., Bennett, J. W., 2013. *Arabidopsis thaliana* as a model system for testing the effects of *Trichoderma* volatile organic compounds. *Fungal Ecology* 6, 19–26.

Google Scholar: [Author Only](#) [Title Only](#) [Author and Title](#)

Israel Pagan and Fernando Garcia-Arenal 2018. Tolerance to Plant Pathogens: Theory and Experimental Evidence. *Int J Mol Sci.* 19(3), 810. doi: 10.3390/ijms19030810, PMID: PMC5877671

Google Scholar: [Author Only](#) [Title Only](#) [Author and Title](#)

Jagtap, G. P., Mali, A. K., & Utpal, D., 2013. Bioefficacy of fungicides, bio-control agents and botanicals against leaf spot of turmeric incited by *Colletotrichum capsici*. *African Journal of Microbiological Research* 7(18), 1865-1873. <https://doi.org/10.5897/ajmr12.2252>

Google Scholar: [Author Only](#) [Title Only](#) [Author and Title](#)

Jones, J.D., Dangl, J.L., 2006. The plant immune system. *Nature* 444, 323–329.

Google Scholar: [Author Only](#) [Title Only](#) [Author and Title](#)

Kendre, V. P., Ingle, R. W., Deshmukh, V. V., & Vyavhare, G. F., 2017. Integrated management of leaf blight caused by *Colletotrichum gloeosporioides* of *Piper longum*. *International Journal of Chemical Studies* 5(4), 1680-1683.

Google Scholar: [Author Only](#) [Title Only](#) [Author and Title](#)

Koch, K.G., Chapman K., Louis, J., Heng-Moss, T. and Sarath, G., 2016. Plant Tolerance: A Unique Approach to Control Hemipteran Pests. *Front. Plant Sci.* 7,1363. doi: 10.3389/fpls.2016.01363

Google Scholar: [Author Only](#) [Title Only](#) [Author and Title](#)

Kosova, K., Vitamvas, P., Urban, M.O., Prasil, I.T., Renaut, J., 2018. Plant abiotic stress proteomics: the major factors determining alterations in cellular proteome. *Front. Plant Sci.* 9, 122.

Google Scholar: [Author Only](#) [Title Only](#) [Author and Title](#)

Kozłowski, L. A., Simoes, D. F. M., Sousa, C. D., & Trento, M., 2009. Physiological effects of strobilurins F 500 in the growth and yield of bean. *Revista Academica Ciencias Agrarias e Ambientais* 7, 41-54.

Google Scholar: [Author Only](#) [Title Only](#) [Author and Title](#)

Kumar, A., Shukla, R., Singh, P., Prasad, C. S., & Dubey, N. K., 2008. Assessment of *Thymus vulgaris* L. essential oil as a safe botanical preservative against post-harvest fungal infestation of food commodities. *Food Science Emerg* 4, 575-580.

Google Scholar: [Author Only](#) [Title Only](#) [Author and Title](#)

Li, Y., Sun, R., Yu, J., Saravanakumar, K., & Chen, J., 2016. Antagonistic and Biocontrol Potential of *Trichoderma asperellum* ZJSX5003 against the maize stalk rot pathogen *Fusarium graminearum*. *Indian Journal of Microbiology* 56(3), 318–327. <https://doi.org/10.1007/s12088-016-0581-9>

Google Scholar: [Author Only](#) [Title Only](#) [Author and Title](#)

Lobato, A. K. S., Coimbra, G. K., Neto, M. A. M., Costa, R. C. L., Santos, F. B. G., Oliveira N. C. F., Luz, L. M., Barreto, A. G. T., Pereira, B. W. F., Alves, G. A. R., Monteiro, B. S., & Marochio, C. A., 2009c. Protective action of silicon on water relations and photosynthetic pigments in pepper 573 plants induced to water deficit. *Research Journal of Biological Sciences*, 4, 617-623.

Google Scholar: [Author Only Title Only Author and Title](#)

Lobato, A. K. S., Gonçalves-Vidigal, M. C., Vidigal Filho, P. S., Andrade, C. A. B., Kvitschal, M. V. & Bonato, C. M., 2010. Relationships between leaf pigments and photosynthesis in common bean plants infected by anthracnose. *New Zealand Journal of Crop and Horticultural Science* 38(1), 29-37. <https://doi.org/10.1080/01140671003619308>

Google Scholar: [Author Only Title Only Author and Title](#)

Lopez-Mondéjar, R., Ros, M., & Pascual, J. A., 2011. Mycoparasitism-related genes expression of *Trichoderma harzianum* isolates to evaluate their efficacy as biocontrol agent. *Biological Control* 56(1), 59-66. <https://doi.org/10.1016/j.biocontrol.2010.10.003>

Google Scholar: [Author Only Title Only Author and Title](#)

Makino, A., and Mae, T., 1999. Photosynthesis and plant growth at elevated levels of CO<sub>2</sub>. *Plant Cell Physiol.* 40, 999–1006. doi: 10.1093/oxfordjournals.pcp.a029493

Google Scholar: [Author Only Title Only Author and Title](#)

Mishra, R. S., & Pandey, V. P., 2015. Management of leaf spot of turmeric caused by *Colletotrichum capsici* through fungicides. *Journal of Spices and Aromatic Crops* 24(1), 60-69.

Google Scholar: [Author Only Title Only Author and Title](#)

Modupeola, T. O. & Olaniyi, J. O., 2015. Effects of nitrogen (N) fertilizer and plant spacing on the growth and rhizome yield of turmeric (*Curcuma longa* L.) in Ibadan South-West Nigeria. *International Journal of Plant Science and Ecology* 1(4), 149-154.

Google Scholar: [Author Only Title Only Author and Title](#)

Musheer, N., Ashraf, S., & Chaudhary, A., 2019. Efficacy of fungicides, bioagents and organic manure against *Colletotrichum gloeosporioides* on Growth and Yield of Turmeric (*Curcuma longa* Linn.). *Annals of Plant Protection* 27(1), 95-101. <https://doi.org/10.5958/0974-0163.2019.00019.3>

Google Scholar: [Author Only Title Only Author and Title](#)

Nie, M., Lu, M., Bell, J., Raut, S., & Pendall, E., 2013. Altered root traits due to elevated CO<sub>2</sub>: a meta-analysis. *Global Ecology and Biogeography* 22(10), 1095–1105. <https://doi.org/10.1111/geb.12062>

Google Scholar: [Author Only Title Only Author and Title](#)

Oh, M. M., Carey, E. E., and Rajashekar, C. B., 2009a. Environmental stresses induce health-promoting phytochemicals in lettuce. *Plant Physiol. Biochem.* 47 (7), 578–583. doi:10.1016/j.plaphy.2009.02.008

Google Scholar: [Author Only Title Only Author and Title](#)

Oh, M. M., Trick, H. N., and Rajashekar, C. B., 2009b. Secondary metabolism and antioxidants are involved in environmental adaptation and stress tolerance in lettuce. *J. Plant Physiol.* 166 (2), 180–191. doi:10.1016/j.jplph.2008.04.015

Google Scholar: [Author Only Title Only Author and Title](#)

Pasuvuraji, A., Sevugaperumal, N., 597 & Chandrasekaran, A., 2013. Morphological characterization and molecular phylogeny of *Colletotrichum capsici* causing leaf spot disease of turmeric. *The Bioscan* 8(1), 331-337.

Google Scholar: [Author Only Title Only Author and Title](#)

Polanco, L. R., Rodrigues, F. A., Nascimento, K. J. T., Cruz, M. F. A., Curvelo, C. R. S., DaMatta, F. M., & Vale, F. X. R., 2014. Photosynthetic gas exchange and antioxidative system in common bean plants infected by *Colletotrichum lindemuthianum* and supplied with silicon. *Tropical Plant Pathology* 39(1), 35–42. <https://doi.org/10.1590/s1982-56762014000100005>

Google Scholar: [Author Only Title Only Author and Title](#)

Raia, K. Manoj, Kaliaa K. Rajwant, Singha, Rohtas, Gangolaa P. Manu, Dhawana A.K., 2011. Developing stress tolerant plants through in vitro selection-An overview of the recent progress *Environmental and Experimental Botany* 71, 89–98. doi:10.1016/j.envexpbot.2010.10.021

Google Scholar: [Author Only Title Only Author and Title](#)

Ramakrishnan, T. S., 1954. Leaf spot disease of turmeric (*Curcuma longa* L.) caused by *Colletotrichum capsici* (Syd.) Buil and Bisby. *Indian Phytopathology* 7, 111–117.

Google Scholar: [Author Only Title Only Author and Title](#)

Rao, P. V., A. M. Rao, M.R. and P.S. Rao (1994). Leaf area estimation by linear measurements in turmeric. *Ann. agric. Res.*, 15(2): 231-233.

Google Scholar: [Author Only Title Only Author and Title](#)

Resende, R. S., Rodrigues, F. Á, Cavatte, P. C., Martins, S. C. V., Moreira, W. R., Chaves, A. R. M., & DaMatta, F.M., 2012. Leaf gas exchange and oxidative stress in sorghum plants supplied with silicon and infected by *Colletotrichum sublineolum*. *Phytopathology* 102(9), 892–898. <https://doi.org/10.1094/phyto-01-12-0014-r>

Google Scholar: [Author Only Title Only Author and Title](#)

Roy, S. S., & Hore, J. K., 2012. Effect of organic manures and microbial inoculants on soil nutrient availability and yield of turmeric intercropped in arecanut gardens. *Journal of Crop and Weed* 8(1), 90-94.

Google Scholar: [Author Only Title Only Author and Title](#)

**Sekhar Y.C., Ahammed S.K., Prasad T.N., Devi R.S., 2017. Identification of Trichoderma species based on morphological characters isolated from rhizosphere of groundnut (*Arachis Hypogaea* L). 622 International Journal of Science, Environment and Technology 6 (3), 2056 – 2063.**

Google Scholar: [Author Only](#) [Title Only](#) [Author and Title](#)

**Smakowska-Luzan, E., Mott, G.A., Parys, K., Stegmann, M., Howton, T.C., Layeghifard, M., Neuhold, J., Lehner, A., Kong, J.X., Grunwald, K., Weinberger, N., Satbhai, S.B., Mayer, D., Busch, W., Madalinski, M., Stolt-Bergner, P., Provart, N.J., Mukhtar, M.S., Zipfel, C., Desveaux, D., Guttman, D.S., Belkhadir, Y., 2018. An extracellular network of Arabidopsis leucine-rich repeat receptor kinases. Nature 561, E8.**

Google Scholar: [Author Only](#) [Title Only](#) [Author and Title](#)

**Singh, A., & Avupati, V. R., 2017. Development and Validation of UV-Spectrophotometric method for the Estimation of Curcumin in Standardised Polyherbal Formulations. Journal Young Pharmacists 9(4), 491-495. <https://doi.org/10.5530/jyp.2017.9.96>**

Google Scholar: [Author Only](#) [Title Only](#) [Author and Title](#)

**Singh, S., Joshi, R. K., & Nayak, S., 2013. Identification of elite genotypes of turmeric through agroclimatic zone based evaluation of important drug yielding traits. Industrial Crops and Products, 43, 165–171. <https://doi.org/10.1016/j.indcrop.2012.07.006>**

Google Scholar: [Author Only](#) [Title Only](#) [Author and Title](#)

**Tan, K.C., Oliver, R.P., Solomon, P.S., Moffat, C.S., 2010. Proteinaceous necrotrophic effectors in fungal virulence. Funct. Plant Biol. 37, 907–912.**

Google Scholar: [Author Only](#) [Title Only](#) [Author and Title](#)

**Tapia-Tussell, R., Quijano-Ramayo, A., Cortes-Velazquez, A., Lappe, P., Larque-Saavedra, A., & Perez-Brito, D., 2008. PCR-Based detection and characterization of the fungal pathogens *Colletotrichum gloeosporioides* and *Colletotrichum capsici* causing anthracnose in papaya (*Carica papaya* L.) in the Yucatan Peninsula. Molecular Biotechnology 40(3), 293-298. <https://doi.org/10.1007/s12033-008-9093-0>**

Google Scholar: [Author Only](#) [Title Only](#) [Author and Title](#)

**Thompson, M., Gamage, D., Hirotsu, N., Martin, A & Seneweera, S. 2017. Effects of elevated Carbon dioxide on photosynthesis and carbon partitioning: A perspective on root sugar sensing and hormonal crosstalk. Frontiers in Physiology. 8, 578. <https://doi.org/10.3389/fphys.2017.00578>**

Google Scholar: [Author Only](#) [Title Only](#) [Author and Title](#)

**Van der Kooi, C. J., Reich, M., Löw, M., De Kok, L. J., Tausz, M., 2016. Growth and yield stimulation under elevated CO<sub>2</sub> and drought: a meta-analysis on crops, Journal of Environmental and Experimental Botany 122, 150–157. <https://doi.org/10.1016/j.envexpbot.2015.10.004>**

Google Scholar: [Author Only](#) [Title Only](#) [Author and Title](#)

**Vasala, P. A., 2012. Ginger, in Handbook of Herbs and Spices, Second Edn (319-335 p.). Woodhead Publishing.**

Google Scholar: [Author Only](#) [Title Only](#) [Author and Title](#)

**Wharton, P. S., & Dieguez-Uribeondo, J., 2004. The biology of *Colletotrichum acutatum*. Anales del Jardin Botanico de Madrid 61, 3-22.**

Google Scholar: [Author Only](#) [Title Only](#) [Author and Title](#)

**Wu, Y., Deng, Z., Lai, J., Zhang, Y., Yang, C., Yin, B., Zhao, Q., Zhang, L., Li, Y., Yang, C 2009. Dual function of Arabidopsis ATAF1 in abiotic and biotic stress responses. Cell Res. 19, 1279–1290.**

Google Scholar: [Author Only](#) [Title Only](#) [Author and Title](#)

**Xing, J., Pan, D., Wang, L., Tan, F., Chen, W., 2019. Proteomic and physiological responses in mangrove *Kandelia candel* roots under short-term high-salinity stress. Turk. J. Biol. 43, 314–325.**

Google Scholar: [Author Only](#) [Title Only](#) [Author and Title](#)

**Yadav, A. L., Ghasolia, R. P., Choudhary, S., & Yadav, V. K., 2017. Exploitation of fungicides and plant extracts for ecofriendly management of chilli fruit rot disease. International Journal of Chemical Studies 5(4), 1632-1634.**

Google Scholar: [Author Only](#) [Title Only](#) [Author and Title](#)

**Zhu, J.K., 2002. Salt and drought stress signal transduction in plants. Annu. Rev. Plant Biol. 53, 247–273.**

Google Scholar: [Author Only](#) [Title Only](#) [Author and Title](#)
